# Supplementary material
Source: PubMed Central journal article supplement (PMC5710533)
Supplement: jamaneurol-74-857-s001.pdf [file jamaneurol-74-857-s001.pdf]

## Supplementary Online Content

Montero-Odasso MM, Sarquis-Adamson Y, Speechley M, et al. Association of dual-task gait with incident dementia in mild cognitive impairment: results from the Gait and Brain Study. *JAMA Neurol.* doi:10.1001/jamaneurol.2017.0643.

**eTable 1.** Cox Proportional Hazard Regression of the Association of Gait Velocity and Incident Dementia Modeled as a Dichotomous Variable, Using Cutoffs Based on 1.5 SD Below Cohort Mean and ROC Analysis.

**eTable 2.** Cox Proportional Hazard Regression of the Association of Gait Velocity Stratified By Quartiles, Under Single and Dual-Task Conditions.

**eTable 3.** Gait Performance in the Complete Cohort and Stratified By APOE4 Carrier Status (at Least One e4 Allele).

**eTable 4.** Cox Proportional Hazard Regression of the Association of MMSE and MoCA Performance With Incident Dementia Modeled As Continuous and Dichotomous Variables.

This supplementary material has been provided by the authors to give readers additional information about their work.

**eTable 1.** Cox proportional hazard regression of the association of gait velocity and incident dementia modeled as a dichotomous variable, using cut-offs based on 1.5SD below cohort mean and ROC analysis.

|                             | unadjusted       |                | adjusted†         |                |
|-----------------------------|------------------|----------------|-------------------|----------------|
|                             | HR, 95% CI       | <i>p</i> value | HR, 95% CI        | <i>p</i> value |
| Gait Velocity (single-task) |                  |                |                   |                |
| Slow Gait (below 1.5SD)*    | 1.99 (0.60-6.64) | .260           | 2.69 (0.70-10.29) | .149           |
| Slow Gait (below ROC)**     | 1.16 (0.54-2.47) | .704           | 1.34 (0.57-3.15)  | .499           |

†Adjusted for age, gender, years of education, and number of comorbidities.

\*<0.76m/s; \*\*<1.08 m/s.

**eTable 2.** Cox proportional hazard regression of the association of gait velocity stratified by quartiles, under single and dual-task conditions.

|                              | unadjusted        |                | adjusted†          |                 |
|------------------------------|-------------------|----------------|--------------------|-----------------|
|                              | HR, (95% CI)      | <i>p</i> value | HR, (95% CI)       | <i>p</i> value  |
| Single Gait Velocity         |                   |                |                    |                 |
| Quartile 1 (<94 cm/s)        | 1.60 (0.58-4.44)  | .367           | 2.12 (0.63-7.17)   | .227            |
| Quartile 2 (94-107 cm/s)     | 0.91 (0.30-2.71)  | .864           | 0.76 (0.24-2.39)   | .643            |
| Quartile 3 (107-121 cm/s)    | 0.74 (0.25-2.20)  | .584           | 0.38 (0.098-1.50)  | .167            |
| Counting Gait Velocity       |                   |                |                    |                 |
| Quartile 1 (<81cm/s)         | 3.84 (1.33-11.14) | <b>.013</b>    | 13.39 (3.76-47.75) | <b>&lt;.001</b> |
| Quartile 2 (81-98 cm/s)      | 1.96 (0.62-6.18)  | .252           | 2.53 (0.75-8.51)   | .132            |
| Quartile 3 (98-115 cm/s)     | 1.03 (0.27-3.83)  | .969           | 0.55 (0.13-2.41)   | .430            |
| Serial Sevens Gait Velocity  |                   |                |                    |                 |
| Quartile 1 (<63 cm/s)        | 2.46 (0.83-7.26)  | .103           | 2.40 (0.77-7.45)   | .130            |
| Quartile 2 (63-79 cm/s)      | 2.17 (0.70-6.68)  | .177           | 2.33 (0.68-7.98)   | .177            |
| Quartile 3 (79-95 cm/s)      | 0.57 (0.14-2.41)  | .450           | 0.451 (0.09-2.15)  | .318            |
| Naming Animals Gait Velocity |                   |                |                    |                 |

|                          |                   |             |                   |                 |
|--------------------------|-------------------|-------------|-------------------|-----------------|
| Quartile 1 (<68 cm/s)    | 3.47 (1.20-10.04) | <b>.022</b> | 9.89 (2.91-33.62) | <b>&lt;.001</b> |
| Quartile 2 (68-87 cm/s)  | 1.86 (0.56-6.11)  | .309        | 1.16 (0.30-4.53)  | .827            |
| Quartile 3 (87-101 cm/s) | 1.03 (0.30-3.57)  | .961        | 0.96 (0.26-3.51)  | .947            |

Note: Quartile 4 is the reference quartile

†Adjusted for age, gender, years of education, and number of comorbidities.

**eTable 3.** Gait performance in the complete cohort and stratified by APOE4 carrier status (at least one e4 allele).

| ApoE4                              | All participants (n=59) | ApoE4 carrier (n=23) | ApoE4 non-carriers (n=36) | <i>p</i> value* |
|------------------------------------|-------------------------|----------------------|---------------------------|-----------------|
| <b>Continuous</b>                  |                         |                      |                           |                 |
| Single gait velocity, mean (SD)    | 107.42 (21.26)          | 103.64 (22.96)       | 105.48 (21.93)            | .758            |
| Counting gait velocity, mean (SD)  | 98.45 (26.38)           | 98.52 (29.70)        | 100.65 (26.6)             | .775            |
| Serial 7s gait velocity, mean (SD) | 80.59 (29.21)           | 87.56 (33.14)        | 87.04 (28.88)             | .951            |
| Naming Animals gait vel, mean (SD) | 87.46 (27.48)           | 89.68 (31.20)        | 88.60 (28.01)             | .890            |
| <b>Continuous</b>                  |                         |                      |                           |                 |
| DTC Counting; mean (SD)            | 8.82 (14.09)            | 12.13 (2.53)         | 4.96 (13.75)              | .784            |
| DTC Serial Sevens; mean (SD)       | 24.54 (19.49)           | 17.23 (17.45)        | 18.48 (16.06)             | .782            |
| DTC Naming Animals; mean (SD)      | 19.18 (17.27)           | 14.79 (15.78)        | 16.92 (16.63)             | .955            |
| <b>Dichotomous</b>                 |                         |                      |                           |                 |
| DTC Counting (>20%); n (%)         | 8 (14%)                 | 4 (7%)               | 4 (7%)                    | .699            |
| DTC Serial Sevens (>20%); n (%)    | 29 (49%)                | 9 (15%)              | 20 (34%)                  | .417            |
| DTC Naming animals (>20%); n (%)   | 28 (47%)                | 9 (15%)              | 19 (32%)                  | .424            |

\*Analyses were performed using Student t-test for continuous variables and Chi-Square for dichotomous variables.

**eTable 4.** Cox proportional hazard regression of the association of MMSE and MoCA performance with incident dementia modeled as continuous and dichotomous variables.

|                  | Unadjusted        |                 | Model A           |                 | Model B           |                 |
|------------------|-------------------|-----------------|-------------------|-----------------|-------------------|-----------------|
|                  | HR (95% CI)       | <i>P</i> value  | HR (95% CI)       | <i>P</i> value  | HR (95% CI)       | <i>P</i> value  |
| <b>MMSE</b>      |                   |                 |                   |                 |                   |                 |
| Continuous       | 1.35 (1.20-1.51)  | <b>&lt;.001</b> | 1.37 (1.19-1.59)  | <b>&lt;.001</b> | 1.35 (1.18-1.56)  | <b>&lt;.001</b> |
| Dichotomous, <26 | 5.96 (2.61-13.61) | <b>&lt;.001</b> | 5.02 (2.05-12.29) | <b>&lt;.001</b> | 3.77 (1.96-11.60) | <b>.001</b>     |

| <b>MoCA</b>      |                   |                 |                   |                 |                   |                 |
|------------------|-------------------|-----------------|-------------------|-----------------|-------------------|-----------------|
| Continuous       | 1.35 (1.19-1.51)  | <b>&lt;.001</b> | 1.31 (1.14-1.51)  | <b>&lt;.001</b> | 1.30 (0.12-1.49)  | <b>&lt;.001</b> |
| Dichotomous, <26 | 6.11 (1.84-20.36) | <b>.003</b>     | 3.71 (1.05-13.10) | <b>.042</b>     | 3.56 (1.00-12.67) | <u>.050</u>     |

Model A: adjusted for age, sex, education, and comorbidities. Model B: adjusted for age, sex, education, and comorbidities, and baseline gait velocity
